# Supplementary material for: GSH-Activatable Aggregation-Induced Emission Cationic Lipid for Efficient Gene Delivery
Source: MDPI journal article supplement (doi:10.3390/molecules28041645), 2023-02-08
Supplement: s1 [file s1]

## Supporting Information

Article

# GSH-Activatable Aggregation-Induced Emission Cationic Lipid for Efficient Gene Delivery

Yue-Rui Yuan <sup>a</sup>, Qiang Liu <sup>a</sup>, Deyu Wang <sup>a</sup>, Yu-Dan Deng <sup>a</sup>, Ting-Ting Du <sup>a</sup>, Wen-Jing Yi <sup>b\*</sup> and Sheng-Tao Yang <sup>b\*</sup>

<sup>a</sup> Key Laboratory of General Chemistry of the National Ethnic Affairs Commission, College of Chemistry and Environment, Southwest Minzu University, Chengdu 610041, P. R. of China; <sup>b</sup> Key Laboratory of Pollution Control Chemistry and Environmental Functional Materials for Qinghai-Tibet Plateau of the National Ethnic Affairs Commission, School of Chemistry and Environment, Southwest Minzu University, Chengdu 610041, China

\* Correspondence: ywjchem@163.com (W.-J.Y.); yangst@pku.edu.cn (S.-T.Y.); tel.: +86-8552-2315 (W.-J.Y.); tel: +86-85570-9707 (S.-T.Y.)

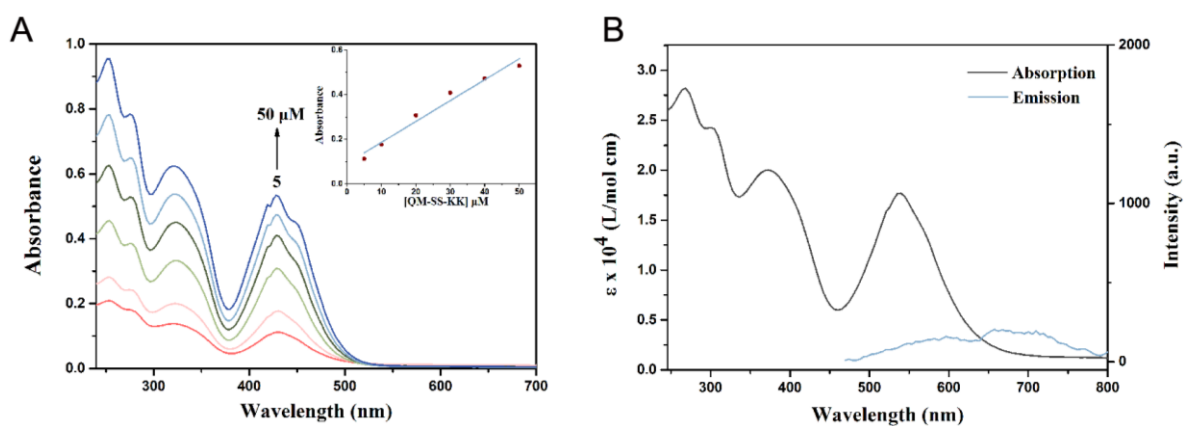

**Figure S1.** Spectroscopic characterizations of QM-SS-KK. (A) UV/vis absorption spectra of QM-SS-KK at various concentrations in deionized water. Inset: The plot of concentration of QM-SS-KK vs. absorbance at 430 nm; (B) The molar absorption coefficient of QM-SS-KK and its emission spectrum in deionized water.

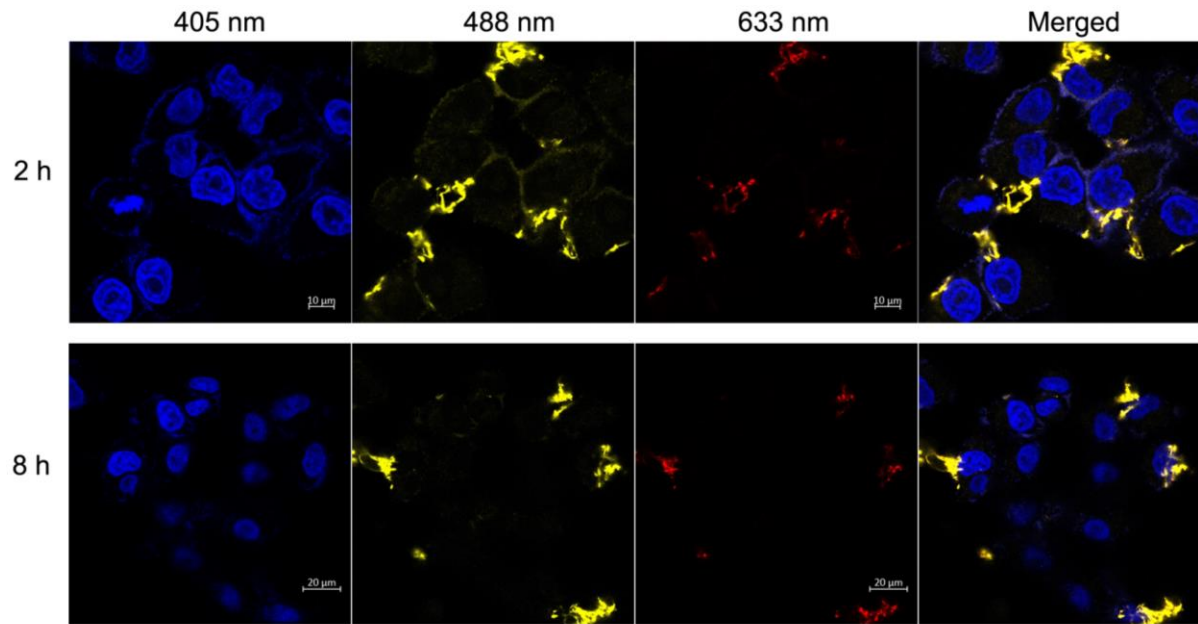

**Figure S2.** CLSM images of HeLa cells transfected with Cy5-labeled DNA by QM-SS-KK/DOPE at N/P ratio of 6 for different time. (Red: Cy5-labeled pDNA; yellow: QM-SS-KK/DOPE; blue: DAPI-stained cell nuclei).
